# Supplementary material for: The fate of recent duplicated genes following a fourth-round whole genome duplication in a tetraploid fish, common carp (Cyprinus carpio)
Source: PubMed Central journal article supplement (PMC4314655; doi:10.1038/srep08199), 2015-02-03
Supplement: srep08199-s1.pdf [file srep08199-s1.pdf]

## SUPPLEMENTARY INFORMATION FOR

The fate of recent duplicated genes following a fourth-round whole genome duplication in a tetraploid fish, common carp (*Cyprinus carpio*)

Jiong-Tang Li<sup>1,†,\*</sup>, Guang-Yuan Hou<sup>1,†</sup>, Xiang-Fei Kong<sup>1,2</sup>, Chun-Yan Li<sup>1,2,3</sup>, Jian-Ming Zeng<sup>1</sup>, Heng-De Li<sup>1</sup>, Gui-Bao Xiao<sup>1,4</sup>, Xiao-Min Li<sup>1,4</sup>, Xiao-Wen Sun<sup>1</sup>

† Equal contributors

### Affiliations

- <sup>1</sup> The Centre for Applied Aquatic Genomics, Chinese Academy of Fishery Sciences, Beijing, 100141, China
- <sup>2</sup> College of Fisheries and Life Science, Shanghai Ocean University, Shanghai, 201306, China
- <sup>3</sup> Tianjin Fisheries Research Institute, Tianjin, 300221, China
- <sup>4</sup> College of Life Science and Technology, Dalian Ocean University, Dalian, 116023, China

Correspondence and requests for materials should be addressed to J.T. L. (lijt@cafs.ac.cn)



## Supplementary Tables

### Table S1. Common carp RDGs and zebrafish orthologs.

(Included in a separated excel file)

### Table S2. *Ka/Ks*, *Ka* and *Ks* values of RDGs.

(Included in a separated excel file)

### Table S3. Gene Ontology annotations of RDGs.

(Included in a separated excel file)

### Table S4. Expression values of RDGs across six tissues.

(Included in a separated excel file)

### Table S5. Sampling analysis of RDG expression correlation.

(Included in a separated excel file)

### Table S6. Differential expression analysis of RDG pairs in each tissue.

(Included in a separated excel file)

### Table S7. Domain annotations of RDGs with Interproscan

(Included in a separated excel file)

### Table S8. *Ka*, *Ks* and expression correlation coefficient of each pair.

(Included in a separated excel file)

### Table S9. The relationship between *Ka* and the expression correlation coefficient across duplicate genes

| <i>Ka</i>          | Pair number | <i>R</i> * | Student <i>t</i> -test P value |
|--------------------|-------------|------------|--------------------------------|
| ≥ 0 and < 0.02     | 192         | -0.046     | 0.524                          |
| ≥ 0.02 and < 0.04  | 316         | -0.056     | 0.318                          |
| ≥ 0.04 and < 0.06  | 212         | -0.046     | 0.505                          |
| ≥ 0.06 and < 0.08  | 103         | -0.105     | 0.291                          |
| ≥ 0.08 and < 0.10) | 65          | 0.09       | 0.478                          |
| ≥ 0.10 and < 0.12) | 43          | 0.047      | 0.763                          |
| ≥ 0.12 and < 0.14) | 37          | 0.231      | 0.169                          |
| ≥ 0.14 and < 0.16) | 23          | 0.267      | 0.218                          |
| ≥ 0.16 and < 0.18) | 20          | 0.248      | 0.291                          |

|                    |    |        |       |
|--------------------|----|--------|-------|
| ≥ 0.18 and < 0.20) | 16 | -0.009 | 0.973 |
| ≥ 0.20             | 65 | -0.035 | 0.782 |

\* Here we calculated the  $R$  between  $Ka$  and the expression correlation coefficient.

**Table S10. The relationship between  $Ks$  and the expression correlation coefficient across duplicate genes**

| <b><math>Ks</math></b> | <b>Pair Number</b> | <b><math>R^*</math></b> | <b>Student <math>t</math>-test P value</b> |
|------------------------|--------------------|-------------------------|--------------------------------------------|
| ≥ 0 and < 0.05         | 2                  |                         |                                            |
| ≥ 0.05 and < 0.1       | 25                 | -0.345                  | 0.091                                      |
| ≥ 0.1 and < 0.15       | 239                | -0.048                  | 0.457                                      |
| ≥ 0.15 and < 0.2       | 340                | 0.032                   | 0.551                                      |
| ≥ 0.2 and < 0.25       | 194                | 0.009                   | 0.905                                      |
| ≥ 0.25 and < 0.3       | 98                 | 0.139                   | 0.173                                      |
| ≥ 0.3 and < 0.35       | 66                 | 0.085                   | 0.499                                      |
| ≥ 0.35 and < 0.4       | 45                 | -0.174                  | 0.254                                      |
| ≥ 0.4 and < 0.45       | 17                 | 0.36                    | 0.155                                      |
| ≥ 0.45 and < 0.5       | 15                 | 0.086                   | 0.761                                      |
| ≥ 0.5                  | 51                 | -0.073                  | 0.610                                      |

\* Here we calculated the  $R$  between  $Ks$  and the expression correlation coefficient.
